# Supplementary material
Source: PubMed Central journal article supplement (PMC3151103)

# NICOTINAMIDE PHOSPHORIBOSYLTRANSFERASE IS ESSENTIAL FOR IL-1 $\beta$ -MEDIATED DEDIFFERENTIATION OF ARTICULAR CHONDROCYTES VIA SIRT1 AND ERK COMPLEX SIGNALING\*

Eun-Hee Hong<sup>1,3</sup>, Hong Shik Yun<sup>1,3</sup>, Jongdoo Kim<sup>1</sup>, Hong-Duck Um<sup>1</sup>, Kee-Ho Lee<sup>1</sup>, Chang-Mo Kang<sup>2</sup>, Su-Jae Lee<sup>3</sup>, Jang-Soo Chun<sup>4</sup>, and Sang-Gu Hwang<sup>1</sup>

From the <sup>1</sup>Division of Radiation Cancer Research and <sup>2</sup>Division of Radiation Effect, Korea Institute of Radiological & Medical Sciences, Seoul 139-706, <sup>3</sup>Department of Chemistry, College of Natural Sciences, Hanyang University, Seoul 133-791, and <sup>4</sup>Department of Life Science, Gwangju Institute of Science and Technology, Gwangju 500-712, Korea

Running head: NAMPT-SIRT1 signaling in chondrocyte dedifferentiation

Address correspondence to: Sang-Gu Hwang, Korea Institute of Radiological & Medical Sciences, 215-4 Gongneung-Dong, Nowon-Ku, Seoul 139-706, Korea. Phone: +82-2-970-1353; Fax: +82-2-970-2417; E-mail: [sgh63@kcch.re.kr](mailto:sgh63@kcch.re.kr)

## FIGURE LEGENDS

Supplementary Figure 1. **Treatment of FK866 alone did not affect chondrocyte phenotype.** A-C, chondrocytes were left untreated (Con) or treated with 50 nM FK866 (FK866) for the indicated periods. Radiation was used as a positive control for SA- $\beta$ -gal staining. The total cell number was quantified by counting the surviving cells using trypan blue solution (A). Cellular senescence was evaluated with the SA- $\beta$ -gal assay. The photomicrographs depict SA- $\beta$ -gal positive cells in radiation treated cells (blue, B). Cell death was detected by FACScan flow cytometer and the number in the corner is the percentage of total cells referring to the percentage of PI-labeled cells (C). Data are presented as results of a mean values with standard deviations (A), a representative photomicrograph (B), or a typical experiment (C) from at least four independent experiments.

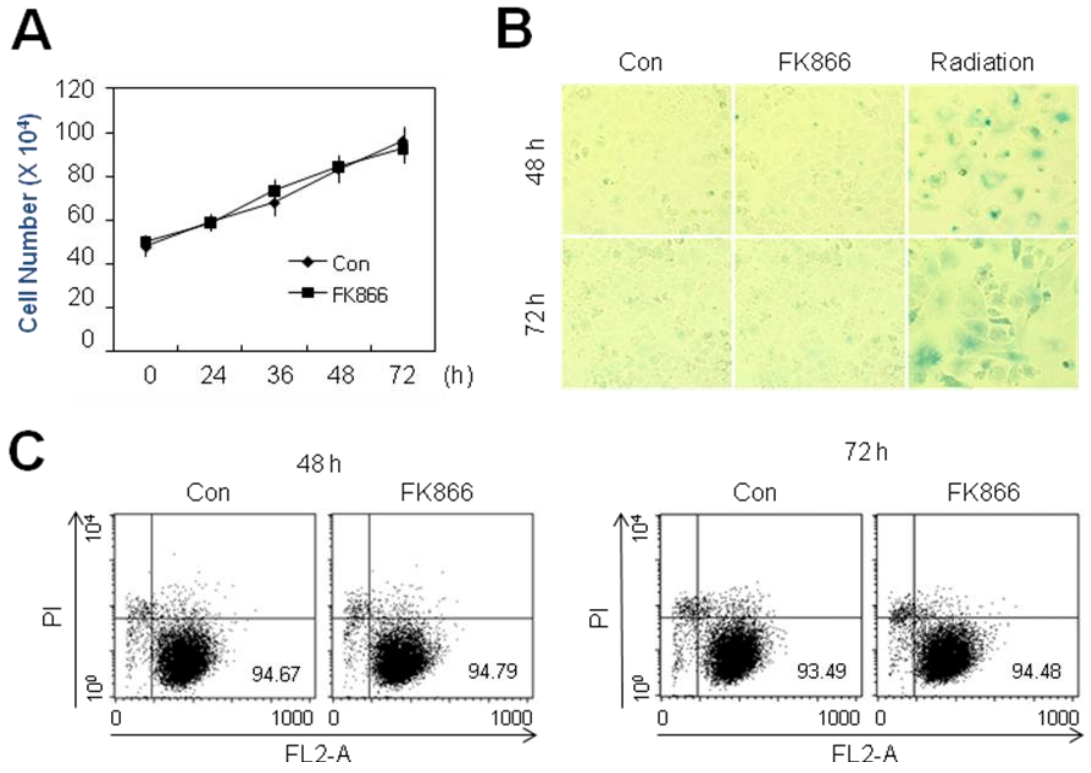

Supplement: supp_M111.219832_jbc.M111.219832-1.pdf [file supp_M111.219832_jbc.M111.219832-1.pdf]
